# Supplementary material for: Pressure mat analysis of naturally occurring lameness in young pigs after weaning
Source: PubMed Central journal article supplement (PMC4236822; doi:10.1186/s12917-014-0193-8), 2014-08-20
Supplement: s12917-014-0193-8-S1.pdf [file s12917-014-0193-8-S1.pdf]

**Full test statistics and exact p – values for all ASI's**

| <b>Contralateral</b> |                      |                |                        |                       |                |
|----------------------|----------------------|----------------|------------------------|-----------------------|----------------|
| <b>Variable</b>      | <b>KW chi-square</b> | <b>P-value</b> | <b>Group</b>           | <b>Mann-Whitney U</b> | <b>P-value</b> |
| CFL PVF              | 11.61                | 0.003          | Sound – lame front     | 40                    | 0.006          |
|                      |                      |                | Sound – lame hind      | 48                    | 0.058          |
|                      |                      |                | Lame front – lame hind | 24                    | 0.014          |
| CFL LR               | 11.09                | 0.004          | Sound – lame front     | 40                    | 0.006          |
|                      |                      |                | Sound – lame hind      | 46                    | 0.093          |
|                      |                      |                | Lame front – lame hind | 24                    | 0.014          |
| CFL VI               | 12.19                | 0.002          | Sound – lame front     | 40                    | 0.006          |
|                      |                      |                | Sound – lame hind      | 50                    | 0.034          |
|                      |                      |                | Lame front – lame hind | 24                    | 0.014          |
| CFL PVP              | 7.01                 | 0.030          | Sound – lame front     | 38                    | 0.013          |
|                      |                      |                | Sound – lame hind      | 37                    | 0.481          |
|                      |                      |                | Lame front – lame hind | 21                    | 0.070          |
| CHL PVF              | 15.48                | 0.000          | Sound – lame hind      | 60                    | 0.001          |
|                      |                      |                | Sound – lame front     | 40                    | 0.006          |
|                      |                      |                | Lame front – lame hind | 2                     | 0.043          |
| CHL LR               | 14.58                | 0.001          | Sound – lame hind      | 60                    | 0.001          |
|                      |                      |                | Sound – lame front     | 40                    | 0.006          |
|                      |                      |                | Lame front – lame hind | 7                     | 0.337          |
| CHL VI               | 15.48                | 0.000          | Sound – lame hind      | 60                    | 0.001          |
|                      |                      |                | Sound – lame front     | 40                    | 0.006          |
|                      |                      |                | Lame front – lame hind | 2                     | 0.043          |
| CHL PVP              | 14.29                | 0.001          | Sound – lame hind      | 60                    | 0.001          |
|                      |                      |                | Sound – lame front     | 40                    | 0.006          |
|                      |                      |                | Lame front – lame hind | 12                    | 1.000          |

| Ipsilateral |               |         |                        |                |         |
|-------------|---------------|---------|------------------------|----------------|---------|
| Variable    | KW chi-square | P-value | Group                  | Mann-Whitney U | P-value |
| ILL PVF     | 11.09         | 0.004   | Sound – lame left      | 40             | 0.006   |
|             |               |         | Sound – lame right     | 46             | 0.093   |
|             |               |         | Lame left – lame right | 24             | 0.014   |
| ILL LR      | 9.07          | 0.011   | Sound – lame left      | 40             | 0.006   |
|             |               |         | Sound – lame right     | 44             | 0.143   |
|             |               |         | Lame left – lame right | 20             | 0.110   |
| ILL VI      | 8.74          | 0.013   | Sound – lame left      | 38             | 0.013   |
|             |               |         | Sound – lame right     | 46             | 0.093   |
|             |               |         | Lame left – lame right | 21             | 0.070   |
| ILL PVP     | 3.86          | 0.145   | Sound – lame left      | 32             | 0.104   |
|             |               |         | Sound – lame right     | 39             | 0.357   |
|             |               |         | Lame left – lame right | 19             | 0.166   |
| ILR PVF     | 6.32          | 0.042   | Sound – lame right     | 51             | 0.026   |
|             |               |         | Sound – lame left      | 16             | 0.621   |
|             |               |         | Lame left – lame right | 3              | 0.070   |
| ILR LR      | 8.22          | 0.016   | Sound – lame right     | 52             | 0.020   |
|             |               |         | Sound – lame left      | 35             | 0.040   |
|             |               |         | Lame left – lame right | 6              | 0.241   |
| ILR VI      | 7.84          | 0.020   | Sound – lame right     | 53             | 0.015   |
|             |               |         | Sound – lame left      | 14             | 0.437   |
|             |               |         | Lame left – lame right | 2              | 0.043   |
| ILR PVP     | 9.53          | 0.009   | Sound – lame right     | 56.5           | 0.005   |
|             |               |         | Sound – lame left      | 32             | 0.104   |
|             |               |         | Lame left – lame right | 6              | 0.241   |

| Diagonal |               |         |                                                                       |                |         |
|----------|---------------|---------|-----------------------------------------------------------------------|----------------|---------|
| Variable | KW chi-square | P-value | Group                                                                 | Mann-Whitney U | P-value |
| DL PVF   | 9.52          | 0.009   | Sound – Lameness left front or right hind                             | 40             | 0.006   |
|          |               |         | Sound – Lameness right front or left hind                             | 37             | 0.481   |
|          |               |         | Lameness left front or right hind – lameness right front or left hind | 24             | 0.014   |
| DLL LR   | 10.94         | 0.004   | Sound – Lameness left front or right hind                             | 40             | 0.006   |
|          |               |         | Sound – Lameness right front or left hind                             | 51             | 0.026   |
|          |               |         | Lameness left front or right hind – lameness right front or left hind | 19             | 0.166   |
| DLL VI   | 9.15          | 0.010   | Sound – Lameness left front or right hind                             | 40             | 0.006   |
|          |               |         | Sound – Lameness right front or left hind                             | 29             | 0.957   |
|          |               |         | Lameness left front or right hind – lameness right front or left hind | 24             | 0.014   |
| DLL PVP  | 13.90         | 0.001   | Sound – Lameness left front or right hind                             | 40             | 0.006   |
|          |               |         | Sound – Lameness right front or left hind                             | 55             | 0.008   |
|          |               |         | Lameness left front or right hind – lameness right front or left hind | 24             | 0.014   |
| DLR PVF  | 9.14          | 0.010   | Sound – Lameness right front or left hind                             | 55             | 0.008   |
|          |               |         | Sound – Lameness left front or right hind                             | 29             | 0.229   |
|          |               |         | Lameness left front or right hind – lameness right front or left hind | 2              | 0.043   |
| DLR LR   | 14.66         | 0.001   | Sound – Lameness right front or left hind                             | 60             | 0.001   |
|          |               |         | Sound – Lameness left front or right hind                             | 38             | 0.013   |
|          |               |         | Lameness left front or right hind – lameness right front or left hind | 2              | 0.043   |
| DLR VI   | 9.33          | 0.009   | Sound – Lameness right front or left hind                             | 56             | 0.006   |
|          |               |         | Sound – Lameness left front or right hind                             | 19             | 0.944   |
|          |               |         | Lameness left front or right hind – lameness right front or left hind | 1              | 0.025   |
| DLR PVP  | 13.01         | 0.001   | Sound – Lameness right front or left hind                             | 60             | 0.001   |
|          |               |         | Sound – Lameness left front or right hind                             | 35             | 0.040   |
|          |               |         | Lameness left front or right hind – lameness right front or left hind | 4              | 0.110   |
